# Supplementary material
Source: publisher figshare collection journal article supplement (https://frontiersin.figshare.com/ndownloader/files/30977722)

**Full unedited blots for Figure 1.**

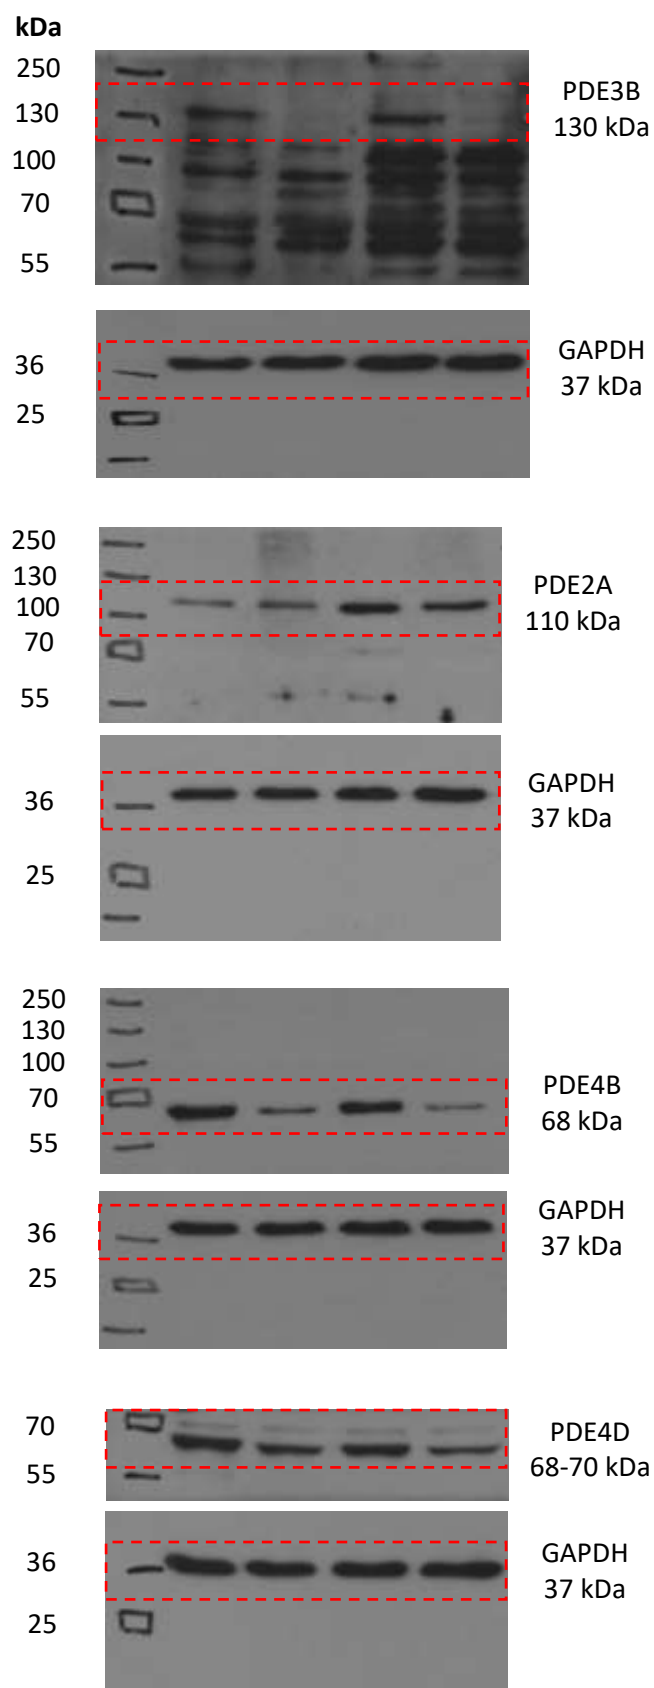

Supplement: Supplementary file [file 30977722]
